# Supplementary material for: Metagenomic Detection and Genetic Characterization of Human Sapoviruses among Children with Acute Flaccid Paralysis in Nigeria
Source: MDPI journal article supplement (doi:10.3390/pathogens13030264), 2024-03-19
Supplement: s1 [file s1]

**Supplementary Table 1: Summary of samples analysed in this study including the number of samples per pool, location where samples were collected and month of sample collection**

| <b>Sample ID</b> | <b>Number of samples per pool</b> | <b>Location</b> | <b>Month</b> |
|------------------|-----------------------------------|-----------------|--------------|
| AFP01-NGR*       | 5                                 | LAGOS           | JANUARY      |
| AFP02-NGR        | 6                                 | ANAMBRA         | JANUARY      |
| AFP03-NGR        | 5                                 | EDO             | JANUARY      |
| AFP04-NGR        | 5                                 | FCT             | JANUARY      |
| AFP05-NGR        | 5                                 | KADUNA          | JANUARY      |
| AFP06-NGR        | 5                                 | LAGOS           | FEBRUARY     |
| AFP07-NGR        | 5                                 | ANAMBRA         | FEBRUARY     |
| AFP08-NGR        | 5                                 | EDO             | FEBRUARY     |
| AFP09-NGR        | 5                                 | FCT             | FEBRUARY     |
| AFP010-NGR*      | 5                                 | KADUNA          | FEBRUARY     |
| AFP011-NGR       | 2                                 | FCT, ABUJA      | MARCH        |
| AFP012-NGR       | 1                                 | KADUNA          | MARCH        |
| AFP013-NGR       | 5                                 | LAGOS           | APRIL        |
| AFP014-NGR       | 7                                 | EDO             | APRIL        |
| AFP015-NGR*      | 7                                 | FCT             | APRIL        |
| AFP016-NGR       | 5                                 | KADUNA          | APRIL        |
| AFP017-NGR       | 5                                 | ANAMBRA         | MAY          |
| AFP018-NGR*      | 5                                 | EDO             | MAY          |
| AFP019-NGR       | 4                                 | FCT             | MAY          |
| AFP020-NGR*      | 5                                 | KADUNA          | MAY          |
| AFP021-NGR       | 5                                 | LAGOS           | JUNE         |
| AFP022-NGR       | 5                                 | ANAMBRA         | JUNE         |
| AFP023-NGR       | 5                                 | EDO             | JUNE         |
| AFP024-NGR       | 5                                 | FCT             | JUNE         |
| AFP025-NGR       | 5                                 | KADUNA          | JUNE         |
| AFP026-NGR       | 5                                 | LAGOS           | JULY         |
| AFP027-NGR       | 5                                 | ANAMBRA         | JULY         |
| AFP028-NGR       | 5                                 | EDO             | JULY         |
| AFP029-NGR       | 3                                 | FCT             | JULY         |
| AFP030-NGR       | 5                                 | KADUNA          | JULY         |
| AFP031-NGR       | 5                                 | LAGOS           | AUGUST       |
| AFP032-NGR       | 5                                 | ANAMBRA         | AUGUST       |
| AFP033-NGR*      | 5                                 | EDO             | AUGUST       |
| AFP034-NGR       | 4                                 | FCT             | AUGUST       |
| AFP035-NGR       | 5                                 | KADUNA          | AUGUST       |
| AFP036-NGR       | 4                                 | LAGOS           | SEPTEMBER    |
| AFP037-NGR       | 5                                 | ANAMBRA         | SEPTEMBER    |
| AFP038-NGR       | 5                                 | EDO             | SEPTEMBER    |

|             |   |         |           |
|-------------|---|---------|-----------|
| AFP039-NGR* | 5 | FCT     | SEPTEMBER |
| AFP040-NGR  | 4 | KADUNA  | SEPTEMBER |
| AFP041-NGR  | 4 | LAGOS   | OCTOBER   |
| AFP042-NGR  | 4 | ANAMBRA | OCTOBER   |
| AFP043-NGR  | 4 | EDO     | OCTOBER   |
| AFP044-NGR  | 5 | FCT     | OCTOBER   |
| AFP045-NGR  | 2 | KADUNA  | OCTOBER   |
| AFP046-NGR* | 5 | LAGOS   | NOVEMBER  |
| AFP047-NGR  | 2 | ANAMBRA | NOVEMBER  |
| AFP048-NGR  | 5 | EDO     | NOVEMBER  |
| AFP049-NGR  | 5 | FCT     | NOVEMBER  |
| AFP050-NGR  | 5 | KADUNA  | NOVEMBER  |
| AFP051-NGR  | 5 | LAGOS   | DECEMBER  |
| AFP052-NGR  | 5 | ANAMBRA | DECEMBER  |
| AFP053-NGR  | 3 | EDO     | DECEMBER  |
| AFP054-NGR  | 3 | FCT     | DECEMBER  |
| AFP055-NGR  | 5 | KADUNA  | DECEMBER  |

\*Sample pools from where SaVs described in the study were detected.

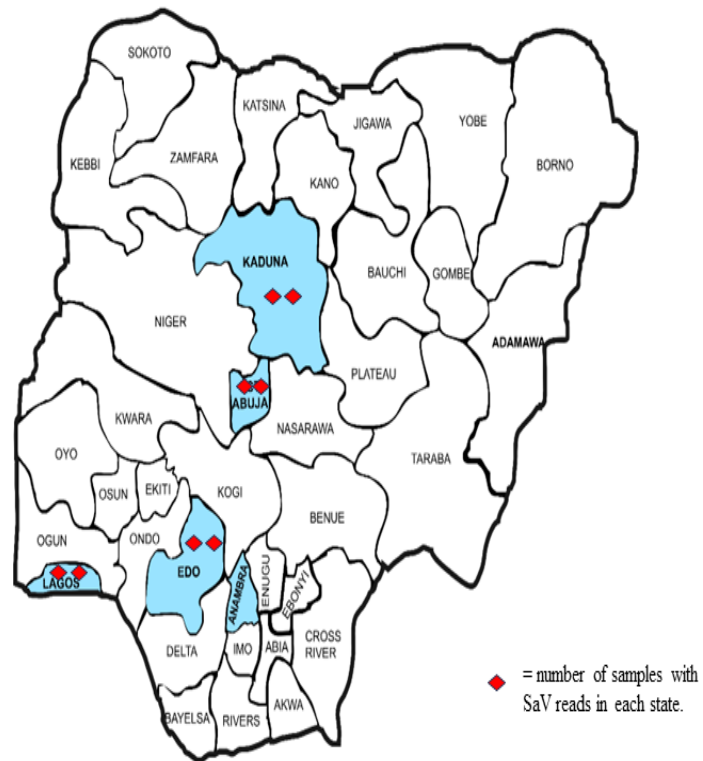

**Supplementary Figure 1:** Map of Nigeria indicating the states (highlighted in light blue) spread across five geopolitical zones from where samples analyzed in this study were collected and the number of samples with SaV reads detected (highlighted in red diamond) from each state.
